# Supplementary material
Source: PubMed Central journal article supplement (PMC9764990)
Supplement: NIHMS1854001-supplement-Sup_1.pdf [file NIHMS1854001-supplement-Sup_1.pdf]

# ATP-sensitive potassium channels in zebrafish cardiac and vascular smooth muscle

Colin G Nichols, Soma S Singareddy, Helen I Roessler, Conor McClenaghan, Jennifer M Ikle, Robert Tryon, and Gijs van Haften

DOI: 10.1113/JP282157

Corresponding author(s): Colin Nichols ([cnichols@wustl.edu](mailto:cnichols@wustl.edu))

The following individual(s) involved in review of this submission have agreed to reveal their identity: William A. Coetzee (Referee #2)

---

## Review Timeline:

|                     |             |
|---------------------|-------------|
| Submission Date:    | 05-Aug-2021 |
| Editorial Decision: | 26-Aug-2021 |
| Revision Received:  | 02-Nov-2021 |
| Accepted:           | 18-Nov-2021 |

---

Senior Editor: Peking Fong

Reviewing Editor: Robert Harvey

## Transaction Report:

(Note: With the exception of the correction of typographical or spelling errors that could be a source of ambiguity, letters and reports are not edited. Depending on transfer agreements, referee reports obtained elsewhere may or may not be included in this compilation. Referee reports are anonymous unless the Referee chooses to sign their reports.)

Dear Dr Nichols,

Re: JP-RP-2021-282157 "ATP-sensitive potassium channels in zebrafish cardiac and vascular smooth muscle" by Colin G Nichols, Soma S Singareddy, Helen I Roessler, Conor McClenaghan, Jennifer M Ikle, Robert Tryon, and Gijs van Haften

Thank you for submitting your manuscript to The Journal of Physiology. It has been assessed by a Reviewing Editor and by 2 expert Referees and I am pleased to tell you that it is considered to be acceptable for publication following satisfactory revision.

Please advise your co-authors of this decision as soon as possible.

The reports are copied at the end of this email. Please address all of the points and incorporate all requested revisions, or explain in your Response to Referees why a change has not been made.

**NEW POLICY:** In order to improve the transparency of its peer review process The Journal of Physiology publishes online as supporting information the peer review history of all articles accepted for publication. Readers will have access to decision letters, including all Editors' comments and referee reports, for each version of the manuscript and any author responses to peer review comments. Referees can decide whether or not they wish to be named on the peer review history document.

Authors are asked to use The Journal's premium BioRender (<https://biorender.com/>) account to create/redrawn their Abstract Figures. Information on how to access The Journal's premium BioRender account is here: <https://physoc.onlinelibrary.wiley.com/journal/14697793/biorender-access> and authors are expected to use this service. This will enable Authors to download high-resolution versions of their figures.

I hope you will find the comments helpful and have no difficulty returning your revisions within 4 weeks.

Your revised manuscript should be submitted online using the links in Author Tasks Link Not Available.

Any image files uploaded with the previous version are retained on the system. Please ensure you replace or remove all files that have been revised.

#### REVISION CHECKLIST:

- Article file, including any tables and figure legends, must be in an editable format (eg Word)
- Abstract figure file (see above)
- Statistical Summary Document
- Upload each figure as a separate high quality file
- Upload a full Response to Referees, including a response to any Senior and Reviewing Editor Comments;
- Upload a copy of the manuscript with the changes highlighted.

You may also upload:

- A potential 'Cover Art' file for consideration as the Issue's cover image;
- Appropriate Supporting Information (Video, audio or data set [https://jp.msubmit.net/cgi-bin/main.plex?form\\_type=display\\_requirements#supp](https://jp.msubmit.net/cgi-bin/main.plex?form_type=display_requirements#supp)).

To create your 'Response to Referees' copy all the reports, including any comments from the Senior and Reviewing Editors, into a Word, or similar, file and respond to each point in colour or CAPITALS and upload this when you submit your revision.

I look forward to receiving your revised submission.

If you have any queries please reply to this email and staff will be happy to assist.

Yours sincerely,

Dr Peking Fong

Senior Editor  
The Journal of Physiology  
<https://jp.msubmit.net>  
<http://jp.physoc.org>  
The Physiological Society  
Hodgkin Huxley House  
30 Farringdon Lane  
London, EC1R 3AW  
UK  
<http://www.physoc.org>  
<http://journals.physoc.org>

-----  
REQUIRED ITEMS:

-Author photo and profile. First (or joint first) authors are asked to provide a short biography (no more than 100 words for one author or 150 words in total for joint first authors) and a portrait photograph. These should be uploaded and clearly labelled with the revised version of the manuscript. See [Information for Authors](#) for further details.

-You must start the Methods section with a paragraph headed [Ethical Approval](#). A detailed explanation of journal policy and regulations on animal experimentation is given in [Principles and standards for reporting animal experiments in The Journal of Physiology and Experimental Physiology](#) by David Grundy J Physiol, 593: 2547-2549. doi:10.1113/JP270818. ). A checklist outlining these requirements and detailing the information that must be provided in the paper can be found at: <https://physoc.onlinelibrary.wiley.com/hub/animal-experiments>. Authors should confirm in their Methods section that their experiments were carried out according to the guidelines laid down by their institution's animal welfare committee, and conform to the principles and regulations as described in the Editorial by Grundy (2015). The Methods section must contain details of the anaesthetic regime: anaesthetic used, dose and route of administration and method of killing the experimental animals.

-Please upload separate high-quality [figure files](#) via the submission form.

-You must upload original, uncropped western blot/gel images (including controls) if they are not included in the manuscript. This is to confirm that no inappropriate, unethical or misleading image manipulation has occurred <https://physoc.onlinelibrary.wiley.com/hub/journal-policies#imagmanip> These should be uploaded as 'Supporting information for review process only'. Please label/highlight the original gels so that we can clearly see which sections/lanes have been used in the manuscript figures.

-A Statistical Summary Document, summarising the statistics presented in the manuscript, is required upon revision. It must be on the Journal's template, which can be downloaded from the link in the Statistical Summary Document section here: [https://jp.msubmit.net/cgi-bin/main.plex?form\\_type=display\\_requirements#statistics](https://jp.msubmit.net/cgi-bin/main.plex?form_type=display_requirements#statistics)

-Please include an Abstract Figure. The Abstract Figure is a piece of artwork designed to give readers an immediate understanding of the research and should summarise the main conclusions. If possible, the image should be easily 'readable' from left to right or top to bottom. It should show the physiological relevance of the manuscript so readers can assess the importance and content of its findings. Abstract Figures should not merely recapitulate other figures in the manuscript. Please try to keep the diagram as simple as possible and without superfluous information that may distract from the main conclusion(s). Abstract Figures must be provided by authors no later than the revised manuscript stage and should be uploaded as a separate file during online submission labelled as File Type 'Abstract Figure'. Please ensure that you include the figure legend in the main article file. All Abstract Figures should be created using BioRender. Authors should use The Journal's premium BioRender account to export high-resolution images. Details on how to use and access the premium account are included as part of this email.

-----  
EDITOR COMMENTS

Reviewing Editor:

This is a carefully conducted and clearly described study characterizing the ATP-sensitive K<sup>+</sup> channels found in cardiac

myocytes and vascular smooth muscle cells from the zebra fish. This work, while largely descriptive, establishes the zebra fish as a model system for future studies on the role of these channels in the cardiovascular system. The reviewers have just a few points that should be addressed.

Senior Editor:

Two Expert Referees and a Reviewing Editor voice interest in this study's strong potential to advance use of the zebrafish as a model organism for studying cardiovascular ATP-sensitive K channels. I found the manuscript to be thoughtful, well-written, and presented meticulously. Overall, the Referees and RE also concur on the manuscript's soundness and rigor, although Referee 1 suggests the Authors may wish to reconsider the statistical analyses performed. The Authors should have no problems addressing this, as well as a few other minor concerns. Some interesting questions are raised by both Referees; incorporation of thoughts on the different SUR isoforms and effects of ATP-sensitive K channel agonists might be entertained.

-----  
REFeree COMMENTS

Referee #1:

This manuscript describes studies of KATP currents in inside-out patches of membrane from zebra fish ventricular and cardiac myocytes and whole-cell currents from vascular myocytes. Overall, the manuscript is well written and provides the first characterization of KATP channels in fish. Major concerns are listed below:

1. In several of your figures it appears that there is heterogeneity in the variance of the data (based on the SD's presented) suggesting that the use of parametric statistics (ANOVAs and t-tests), which assume homogeneity of variance, should not be performed. Please either transform the data to fix this problem or apply non-parametric statistics to your data. There also is some concern about the low n-values shown in the figures, particularly when borderline p-values are shown.

2. Your finding that the KATP channel agonists did not activate zebra fish KATP channels deserves some additional discussion. Do the protein sequences of the SURs and KATP channels in the fish provide any clues as to why these KCO's are without effect?

Minor concern - page 10, line 275 - Don't you really mean current density, rather than conductance in this sentence? Single channel conductance was not altered, correct? Please revise accordingly.

Referee #2:

Since 2006, when the Seino lab described a third member of the Kir6 subfamily in Zebrafish, little has been done to characterize KATP channels in this organism. The Nichols et al manuscript fills this gap in our knowledge with their description of Zebrafish cardiovascular KATP channels, which is long-overdue given the utility of this model organism to study human disease. The study is well executed and presented. I have only a few relatively minor comments:

The authors describe Kir6.2 and Zebrafish SUR2 expression and function in Zebrafish heart and vessels. A limitation of the study is that alternative isoforms of SUR2 are not considered. In human, SUR2A and SUR2B, which differ in the distal C-terminus as a result of alternative splicing events, are differentially expressed in ventricle and smooth muscle and also display differential pharmacological profiles. Inspection of Zebrafish RefSeq sequences shows that SUR2 has several different isoforms in Zebrafish, with at least one of these (e.g. XM\_017355035.2) that differs in the distal C-terminus.

The present study does not consider the possible presence of SUR2 isoform expression in the Zebrafish cardiovascular system. This should, at the very minimum, be discussed.

The lack of effects of KATP channel openers on the Zebrafish KATP channel is intriguing. It is surprising that efforts have not been made to elucidate the possible molecular mechanisms of this finding. The authors should, at the minimum, discuss possible reasons, which may include sequence differences between human and Zebrafish SUR2. The recent AlphaFold structure predictions of Zebrafish proteins (e.g. <https://www.alphafold.ebi.ac.uk/entry/Q5RH87>) may go a long way to identify structural differences.

Page 10: 100 mM of pinacidil?

---

END OF COMMENTS

**Confidential Review**

**05-Aug-2021**

---



**Response to reviewer's comments** (comments in black, responses in red)

Reviewing Editor:

This is a carefully conducted and clearly described study characterizing the ATP-sensitive K<sup>+</sup> channels found in cardiac myocytes and vascular smooth muscle cells from the zebra fish. This work, while largely descriptive, establishes the zebra fish as a model system for future studies on the role of these channels in the cardiovascular system. The reviewers have just a few points that should be addressed.

We very much appreciate the positive reception from the Editors and reviewers. We have now addressed each point.

Senior Editor:

Two Expert Referees and a Reviewing Editor voice interest in this study's strong potential to advance use of the zebrafish as a model organism for studying cardiovascular ATP-sensitive K channels. I found the manuscript to be thoughtful, well-written, and presented meticulously. Overall, the Referees and RE also concur on the manuscript's soundness and rigor, although Referee 1 suggests the Authors may wish to reconsider the statistical analyses performed. The Authors should have no problems addressing this, as well as a few other minor concerns. Some interesting questions are raised by both Referees; incorporation of thoughts on the different SUR isoforms and effects of ATP-sensitive K channel agonists might be entertained.

Thank you. The statistical analyses have been redone. We have added further consideration of different SUR isoforms and KATP opener insensitivity.

Referee #1:

1. In several of your figures it appears that there is heterogeneity in the variance of the data (based on the SD's presented) suggesting that the use of parametric statistics (ANOVAs and t-tests), which assume homogeneity of variance, should not be performed. Please either transform the data to fix this problem or apply non-parametric statistics to your data. There also is some concern about the low n-values shown in the figures, particularly when borderline p-values are shown.

Statistical analyses have been re-performed using non-parametric tests as suggested, and where indicated.

2. Your finding that the KATP channel agonists did not activate zebrafish KATP channels deserves some additional discussion. Do the protein sequences of the SURs and KATP channels in the fish provide any clues as to why these KCO's are without effect?

This is an interesting point. Unfortunately, given that the KCO binding site in mammalian KATP channels is not yet structurally identified, it is difficult to draw parallels or get a concrete idea as to where the differences lie. As we now discuss, prior studies identified L1249 and T1253 as key residues conferring opener sensitivity in rat SUR2a. Mutation of residue M1290 in hamster SUR1 to Thr (eq. to residue 1253 in SUR2a) renders it fully activated by the other KCOs. Alignment of the zfSUR2A sequence, with the ratSUR2A

---

**Colin G. Nichols FRS, Carl Cori Professor and Director, Center for Investigation of Membrane Excitability Diseases**

sequence shows that the equivalent residue is already Thr in ZF. Thus, it appears that additional unidentified residues may be involved in KCO binding. We have added further consideration of this point in the Discussion.

Minor concern - page 10, line 275 - Don't you really mean current density, rather than conductance in this sentence? Single channel conductance was not altered, correct? Please revise accordingly.

Yes, current density is a less ambiguous term. Revised as suggested.

Referee #2:

Since 2006, when the Seino lab described a third member of the Kir6 subfamily in Zebrafish, little has been done to characterize KATP channels in this organism. The Nichols et al manuscript fills this gap in our knowledge with their description of Zebrafish cardiovascular KATP channels, which is long-overdue given the utility of this model organism to study human disease. The study is well executed and presented. I have only a few relatively minor comments:

The authors describe Kir6.2 and Zebrafish SUR2 expression and function in Zebrafish heart and vessels. A limitation of the study is that alternative isoforms of SUR2 are not considered. In human, SUR2A and SUR2B, which differ in the distal C-terminus as a result of alternative splicing events, are differentially expressed in ventricle and smooth muscle and also display differential pharmacological profiles. Inspection of Zebrafish RefSeq sequences shows that SUR2 has several different isoforms in Zebrafish, with at least one of these (e.g. XM\_017355035.2) that differs in the distal C-terminus.

The present study does not consider the possible presence of SUR2 isoform expression in the Zebrafish cardiovascular system. This should, at the very minimum, be discussed.

A preliminary transcript expression of the two isoforms was obtained using the RT-PCR study, but it is correct that alternative isoforms of SUR2 are not robustly characterized using our electrophysiological studies.. A common way to differentiate the two isoforms in mammals is via pharmacology (as SUR2B, but not SUR2A, is activatable by diazoxide). Given that we do not see KCO activation in either cardiac or vascular KATP, we cannot discriminate isoforms based on pharmacology. We have not tested DZX activation in ZF VSM cells in this study, because there is no control data to show whether zebrafish SUR2B is activatable by DZX. We have added further consideration of tissue-specificity of isoforms and the above imitations in the Discussion.

The lack of effects of KATP channel openers on the Zebrafish KATP channel is intriguing. It is surprising that efforts have not been made to elucidate the possible molecular mechanisms of this finding. The authors should, at the minimum, discuss possible reasons, which may include sequence differences between human and Zebrafish SUR2. The recent AlphaFold structure predictions of Zebrafish proteins (e.g. <https://www.alphafold.ebi.ac.uk/entry/Q5RH87>) may go a long way to identify structural differences.

AlphaFold is an excellent suggestion and we have now examined this, allowing more extensive consideration of the possible reasons for zebrafish KATP insensitivity to KATP openers.



Page 10: 100 mM of pinacidil?

Thank you for pointing this typographical error. It is supposed to be 100  $\mu$ M (0.1 mM). The revised manuscript has now been proofed to remove such errors.

A handwritten signature in blue ink that reads "Colin". The signature is written in a cursive style with a long horizontal stroke at the end.

Dear Dr Nichols,

Re: JP-RP-2021-282157R1 "ATP-sensitive potassium channels in zebrafish cardiac and vascular smooth muscle" by Colin G Nichols, Soma S Singareddy, Helen I Roessler, Conor McClenaghan, Jennifer M Ikle, Robert Tryon, and Gijs van Haaften

I am pleased to tell you that your paper has been accepted for publication in The Journal of Physiology.

**NEW POLICY:** In order to improve the transparency of its peer review process The Journal of Physiology publishes online as supporting information the peer review history of all articles accepted for publication. Readers will have access to decision letters, including all Editors' comments and referee reports, for each version of the manuscript and any author responses to peer review comments. Referees can decide whether or not they wish to be named on the peer review history document.

Are you on Twitter? Once your paper is online, why not share your achievement with your followers. Please tag The Journal (@jphysiol) in any tweets and we will share your accepted paper with our 23,000+ followers!

The last Word version of the paper submitted will be used by the Production Editors to prepare your proof. When this is ready you will receive an email containing a link to Wiley's Online Proofing System. The proof should be checked and corrected as quickly as possible.

Authors should note that it is too late at this point to offer corrections prior to proofing. The accepted version will be published online, ahead of the copy edited and typeset version being made available. Major corrections at proof stage, such as changes to figures, will be referred to the Reviewing Editor for approval before they can be incorporated. Only minor changes, such as to style and consistency, should be made a proof stage. Changes that need to be made after proof stage will usually require a formal correction notice.

All queries at proof stage should be sent to TJP@wiley.com

Yours sincerely,

Dr Peking Fong  
Senior Editor  
The Journal of Physiology  
<https://jp.msubmit.net>  
<http://jp.physoc.org>  
The Physiological Society  
Hodgkin Huxley House  
30 Farringdon Lane  
London, EC1R 3AW  
UK  
<http://www.physoc.org>  
<http://journals.physoc.org>

P.S. - You can help your research get the attention it deserves! Check out Wiley's free Promotion Guide for best-practice recommendations for promoting your work at [www.wileyauthors.com/eoo/guide](http://www.wileyauthors.com/eoo/guide). And learn more about Wiley Editing Services which offers professional video, design, and writing services to create shareable video abstracts, infographics, conference posters, lay summaries, and research news stories for your research at [www.wileyauthors.com/eoo/promotion](http://www.wileyauthors.com/eoo/promotion).

**\* IMPORTANT NOTICE ABOUT OPEN ACCESS \***

Information about Open Access policies can be found here <https://physoc.onlinelibrary.wiley.com/hub/access-policies>

To assist authors whose funding agencies mandate public access to published research findings sooner than 12 months after publication The Journal of Physiology allows authors to pay an open access (OA) fee to have their papers made freely available immediately on publication.

You will receive an email from Wiley with details on how to register or log-in to Wiley Authors Services where you will be able to place an OnlineOpen order.

You can check if your funder or institution has a Wiley Open Access Account here <https://authorservices.wiley.com/author-resources/Journal-Authors/licensing-and-open-access/open-access/author-compliance-tool.html>

Your article will be made Open Access upon publication, or as soon as payment is received.

If you wish to put your paper on an OA website such as PMC or UKPMC or your institutional repository within 12 months of

publication you must pay the open access fee, which covers the cost of publication.

OnlineOpen articles are deposited in PubMed Central (PMC) and PMC mirror sites. Authors of OnlineOpen articles are permitted to post the final, published PDF of their article on a website, institutional repository, or other free public server, immediately on publication.

Note to NIH-funded authors: The Journal of Physiology is published on PMC 12 months after publication, NIH-funded authors DO NOT NEED to pay to publish and DO NOT NEED to post their accepted papers on PMC.

-----  
EDITOR COMMENTS

Reviewing Editor:

The authors have addressed all previous concerns.

Senior Editor:

The Authors thoroughly addressed all comments arising from initial review of their manuscript. Both Expert Referees and the Reviewing Editor agree that this study will be impactful. Please accept my congratulations on a job well done.

-----  
REFEREE COMMENTS

Referee #1:

The authors have adequately addressed my concerns. No additional comments.

Referee #2:

No further comments - the authors are to be congratulated on an excellent study.

**1st Confidential Review**

**02-Nov-2021**

---
