# Supplementary material
Source: PubMed Central journal article supplement (PMC9764990)
Supplement: NIHMS1854001-supplement-Sup_2.pdf [file NIHMS1854001-supplement-Sup_2.pdf]

# The Journal of Physiology Statistical Summary Document

**Manuscript Title:** ATP-sensitive potassium channels in zebrafish cardiac and vascular smooth muscle

**Authors:** Soma S. Singareddy, Helen I. Roessler, Conor McClenaghan, Jen Ikle, Rob Tryon, Gijs van Haften and Colin G. Nichols

**Animal model used, if applicable:** Zebrafish - WT and transgenic (Multiple knockout/knockin mutants of Abcc8, Abcc9, Kcnj8 and Kcnj11) on AB/Tuebingen background.

**Underlying hypothesis:** This investigation tests the make-up of ATP-sensitive potassium (KATP) channels in zebrafish cardiac, and vascular smooth muscle. We test the hypothesis that subunits specified by the two Abcc8 and Abcc9 genes, as well as the Kcnj8 and Kcnj9 genes are differentially expressed and have different roles generating KATP channels in these tissues. In addition we test the hypothesis that nucleotide sensitivity of the channels is different between WT and mutant channels.

**Definitions of 'n':**

Question 1: n = individual patches, each from a different cell, recorded from at least 3 fish of the specified genotype (WT, Kv3.1KO or Kv3.3KO), unless noted.

**Statistical summary table:**

| Experimental question            | Finding                           | Location | Mean value | SD    | n  | p**  | Data comparisons | Statistical test                      | Other variable | Figure |
|----------------------------------|-----------------------------------|----------|------------|-------|----|------|------------------|---------------------------------------|----------------|--------|
| Different K1/2 than WT           | ACM less sensitive to ATP than WT | ACM      | 35.15      | 1.60  | 3  | 0.01 | ACM vs VCM       | Kruskal-Wallis Test                   | -Mg            | 2B     |
|                                  |                                   | VCM      | 18.07      | 1.14  | 5  | 0.01 |                  |                                       | -Mg            |        |
|                                  |                                   | ACM      | 37.04      | 4.31  | 7  |      |                  |                                       | +Mg            |        |
|                                  |                                   | VCM      | 20.44      | 2.62  | 6  |      |                  |                                       | +Mg            |        |
| ACM KATP different from VCM KATP | ACM KATP > VCM KATP               | VCM      | 40.83      | 21.10 | 24 | 0.00 | ACM vs VCM       | Mann-Whitney Test for Two Independent | Samples        | 2B     |
|                                  |                                   | ACM      | 124.00     | 78.35 | 12 |      |                  |                                       |                |        |

The Journal of  
**Physiology** Statistical Summary Document

|                                   |                                         |             |        |       |    |      |               |                     |  |    |
|-----------------------------------|-----------------------------------------|-------------|--------|-------|----|------|---------------|---------------------|--|----|
| Current density different than WT | Sur1, Sur2, and Kir6.2 KO lower than WT | WT VCM      | 40.83  | 21.10 | 24 | -    | Mutants vs WT | Kruskal-Wallis Test |  | 4C |
|                                   |                                         | GE VCM      | 32.00  | 5.66  | 4  | 0.69 |               |                     |  |    |
|                                   |                                         | CY VCM      | 42.00  | 22.98 | 4  | 0.93 |               |                     |  |    |
|                                   |                                         | VM VCM      | 36.00  | 14.42 | 3  | 0.88 |               |                     |  |    |
|                                   |                                         | 6.1- KO VCM | 32.00  | 8.00  | 3  | 0.72 |               |                     |  |    |
|                                   |                                         | SUR1-KO VCM | 16.00  | 6.32  | 5  | 0.02 |               |                     |  |    |
|                                   |                                         | 6.2-KO VCM  | 0.00   | 0.00  | 6  | 0.00 |               |                     |  |    |
|                                   |                                         | SUR2-KO VCM | 0.00   | 0.00  | 6  | 0.00 |               |                     |  |    |
| Different K1/2 than WT            | GE and CY less sensitive than WT        | WT VCM      | 20.44  | 2.62  | 6  | -    | Mutants vs WT | Kruskal-Wallis Test |  | 4D |
|                                   |                                         | GE VCM      | 108.83 | 15.17 | 5  | 0.00 |               |                     |  |    |
|                                   |                                         | CY VCM      | 56.83  | 1.72  | 4  | 0.05 |               |                     |  |    |
|                                   |                                         | VM VCM      | 20.57  | 2.50  | 5  | 0.98 |               |                     |  |    |
|                                   |                                         | 6.1- KO VCM | 18.71  | 0.74  | 3  | 0.42 |               |                     |  |    |
|                                   |                                         | SUR1-KO VCM | 19.49  | 0.73  | 3  | 0.78 |               |                     |  |    |
| Current density different than WT | Sur2, and Kir6.2 lower than WT          | WT ACM      | 124.00 | 78.35 | 12 | -    | Mutants vs WT | Kruskal-Wallis Test |  | 5C |
|                                   |                                         | GE ACM      | 108.00 | 27.76 | 4  | 0.86 |               |                     |  |    |
|                                   |                                         | CY ACM      | 120.00 | 85.42 | 4  | 0.84 |               |                     |  |    |
|                                   |                                         | VM ACM      | 142.67 | 51.59 | 3  | 0.49 |               |                     |  |    |
|                                   |                                         |             |        |       |    |      |               |                     |  |    |

The Journal of  
**Physiology** Statistical Summary Document

|                                                  |                                             |             |        |       |   |      |                                |                                               |         |    |
|--------------------------------------------------|---------------------------------------------|-------------|--------|-------|---|------|--------------------------------|-----------------------------------------------|---------|----|
|                                                  |                                             | 6.1- KO ACM | 153.33 | 41.63 | 3 | 0.32 |                                |                                               |         |    |
|                                                  |                                             | SUR1-KO ACM | 70.00  | 24.88 | 6 | 0.17 |                                |                                               |         |    |
|                                                  |                                             | 6.2-KO ACM  | 0.00   | 0.00  | 6 | 0.00 |                                |                                               |         |    |
|                                                  |                                             | SUR2-KO ACM | 0.00   | 0.00  | 6 | 0.00 |                                |                                               |         |    |
| Different K1/2 than WT                           | GE less sensitive than WT                   | WT ACM      | 37.04  | 4.31  | 7 | -    | Mutants vs WT                  | Kruskal-Wallis Test                           |         | 5D |
|                                                  |                                             | GE ACM      | 211.52 | 15.34 | 3 | 0.07 |                                |                                               |         |    |
|                                                  |                                             | CY ACM      | 60.35  | 3.18  | 3 | 0.26 |                                |                                               |         |    |
|                                                  |                                             | VM ACM      | 28.76  | 1.42  | 3 | 0.23 |                                |                                               |         |    |
|                                                  |                                             | 6.1- KO ACM | 23.52  | 0.71  | 3 | 0.04 |                                |                                               |         |    |
|                                                  |                                             | SUR1-KO ACM | 22.42  | 4.14  | 3 | 0.03 |                                |                                               |         |    |
| Current density different in 0.1 versus 0 ATP    | Current in 0.1, lower than in 0             | WT BA       | -3.29  | 2.93  | 4 | 0.03 | Current in 0.1 ATP vs in 0 ATP | Mann-Whitney Test for Two Independent Samples | 0 ATP   | 6A |
|                                                  |                                             |             | -0.41  | 0.34  | 4 |      |                                |                                               | 0.1 ATP |    |
| Current density different versus 6.1-KO in 0 ATP | wt/GE, wt/VM, and VM/VM greater than 6.1-KO | 6.1-KO BA   | -0.80  | 0.97  | 4 | -    | 6.1-KO vs WT and other mutants | Kruskal-Wallis Test                           | 0 ATP   | 6B |

The Journal of  
**Physiology** Statistical Summary Document

---

|  |          |        |       |    |      |  |  |         |
|--|----------|--------|-------|----|------|--|--|---------|
|  | WT BA    | -3.29  | 2.93  | 4  | 0.23 |  |  | 0 ATP   |
|  | wt/CY BA | -3.35  | 4.50  | 3  | 0.34 |  |  | 0 ATP   |
|  | wt/GE BA | -7.18  | 3.54  | 3  | 0.06 |  |  | 0 ATP   |
|  | wt/VM BA | -9.39  | 5.88  | 5  | 0.01 |  |  | 0 ATP   |
|  | VM BA    | -21.95 | 20.44 | 12 | 0.00 |  |  | 0 ATP   |
|  | VM BA    | -0.61  | 0.18  | 3  | 0.97 |  |  | 0.1 ATP |
